# Supplementary material for: Effects of intramolecular hydrogen bonding on the excited state dynamics of phenol chromophores
Source: Royal Society of Chemistry journal article supplement (doi:10.1039/c3cp44674c), 2013-01-01
Supplement: c3cp44674c.pdf [file c3cp44674c.pdf]

## Supplementary material

Table S1: Oscillator strength and energies (kcal/mol) of 2HAP-1 singlet excited states

|            | TD-B3LYP |        |          | EOM-CCSD |        |          | CAS(13,16) |        |          | CASPT2(13,16) |          |
|------------|----------|--------|----------|----------|--------|----------|------------|--------|----------|---------------|----------|
|            | f        | energy | symmetry | f        | energy | symmetry | f          | energy | symmetry | energy        | symmetry |
| <b>S1</b>  | 0.084    | 90.7   | A'       | 0.105    | 99.5   | A'       | 0.000      | 103.5  | A''      | 90.6          | A''      |
| <b>S2</b>  | 0.000    | 92.2   | A''      | 0.000    | 99.7   | A''      | 0.187      | 116.4  | A'       | 91.1          | A'       |
| <b>S3</b>  | 0.159    | 116.6  | A'       | 0.124    | 129.3  | A'       | 0.000      | 138.7  | A''      | 123.4         | A'       |
| <b>S4</b>  | 0.004    | 131.8  | A''      | 0.003    | 142.1  | A''      | 0.008      | 150.3  | A''      | 142.4         | A''      |
| <b>S5</b>  | 0.168    | 133.7  | A'       | 0.535    | 150.5  | A'       | 0.335      | 157.1  | A'       | 146.2         | A'       |
| <b>S6</b>  | 0.000    | 140.9  | A''      | 0.005    | 152.4  | A''      | 0.002      | 158.9  | A''      | 151.3         | A''      |
| <b>S7</b>  | 0.220    | 141.9  | A'       | 0.223    | 154.8  | A'       | 0.074      | 170.2  | A'       | 163.9         | A''      |
| <b>S8</b>  | 0.000    | 142.6  | A''      | 0.003    | 156.8  | A''      | 0.014      | 171.3  | A''      |               |          |
| <b>S9</b>  | 0.003    | 147.2  | A''      | 0.001    | 165.8  | A''      | 0.000      | 177.5  | A''      |               |          |
| <b>S10</b> | 0.001    | 150.4  | A''      | 0.037    | 166.7  | A'       | 0.006      | 177.9  | A'       |               |          |
| <b>S11</b> | 0.014    | 153.8  | A'       | 0.047    | 167.8  | A'       | 0.114      | 187.2  | A'       |               |          |

Table S2: Oscillator strength and energies (kcal/mol) of 2HAP-2 singlet excited states

|            | TD-B3LYP |        |          | EOM-CCSD |        |          | CAS(13,16) |        |          | CASPT2(13,16) |          |
|------------|----------|--------|----------|----------|--------|----------|------------|--------|----------|---------------|----------|
|            | f        | energy | symmetry | f        | energy | symmetry | f          | energy | symmetry | energy        | symmetry |
| <b>S1</b>  | 0.000    | 82.2   | A''      | 0.000    | 91.5   | A''      | 0.000      | 93.8   | A''      | 80.6          | A''      |
| <b>S2</b>  | 0.085    | 99.9   | A'       | 0.070    | 107.0  | A'       | 0.095      | 123.0  | A'       | 97.5          | A'       |
| <b>S3</b>  | 0.000    | 121.8  | A''      | 0.000    | 135.8  | A''      | 0.001      | 133.0  | A''      | 135.1         | A''      |
| <b>S4</b>  | 0.115    | 122.0  | A'       | 0.111    | 136.0  | A'       | 0.012      | 148.0  | A''      | 136.7         | A'       |
| <b>S5</b>  | 0.000    | 127.8  | A''      | 0.008    | 149.4  | A''      | 0.002      | 154.4  | A''      | 142.4         | A'       |
| <b>S6</b>  | 0.022    | 134.6  | A'       | 0.337    | 153.7  | A'       | 0.071      | 160.8  | A'       | 150.8         | A''      |
| <b>S7</b>  | 0.295    | 137.2  | A'       | 0.408    | 156.5  | A'       | 0.140      | 163.5  | A'       | 157.9         | A''      |
| <b>S8</b>  | 0.005    | 137.5  | A''      | 0.002    | 157.8  | A''      | 0.000      | 166.1  | A''      |               |          |
| <b>S9</b>  | 0.015    | 141.4  | A'       | 0.000    | 158.0  | A''      | 0.011      | 166.9  | A''      |               |          |
| <b>S10</b> | 0.001    | 141.7  | A''      | 0.293    | 160.7  | A'       | 0.008      | 171.4  | A'       |               |          |
| <b>S11</b> | 0.220    | 145.1  | A'       | 0.003    | 161.7  | A''      | 0.000      | 176.9  | A''      |               |          |
| <b>S12</b> | 0.000    | 145.7  | A''      | 0.006    | 166.8  | A''      | 0.094      | 178.8  | A'       |               |          |
| <b>S13</b> | 0.007    | 148.9  | A''      | 0.021    | 167.1  | A'       | 0.181      | 191.9  | A'       |               |          |
| <b>S14</b> | 0.009    | 149.9  | A'       | 0.003    | 170.2  | A''      | 1.053      | 202.9  | A'       |               |          |

Table S3: Oscillator strength and energies (kcal/mol) of 3HAP-a1 singlet excited states

|            | TD-B3LYP |        |          | EOM-CCSD |        |          | CAS(13,16) |        |          | CASPT2(13,16) |          |
|------------|----------|--------|----------|----------|--------|----------|------------|--------|----------|---------------|----------|
|            | f        | energy | symmetry | f        | energy | symmetry | f          | energy | symmetry | energy        | symmetry |
| <b>S1</b>  | 0.000    | 86.6   | A''      | 0.000    | 94.7   | A''      | 0.105      | 99.0   | A''      | 85.2          | A''      |
| <b>S2</b>  | 0.050    | 96.3   | A'       | 0.041    | 106.9  | A'       | 0.077      | 125.5  | A'       | 100.8         | A'       |
| <b>S3</b>  | 0.151    | 116.4  | A'       | 0.185    | 133.9  | A'       | 0.003      | 136.4  | A''      | 123.3         | A'       |
| <b>S4</b>  | 0.000    | 130.3  | A''      | 0.000    | 138.0  | A''      | 0.012      | 149.0  | A''      | 138.0         | A''      |
| <b>S5</b>  | 0.000    | 133.5  | A''      | 0.003    | 152.0  | A''      | 0.000      | 153.6  | A''      | 146.7         | A'       |
| <b>S6</b>  | 0.252    | 135.3  | A'       | 0.496    | 153.1  | A'       | 0.330      | 158.8  | A'       | 152.4         | A''      |
| <b>S7</b>  | 0.002    | 138.4  | A''      | 0.275    | 160.6  | A'       | 0.008      | 163.3  | A''      | 159.7         | A''      |
| <b>S8</b>  | 0.058    | 145.2  | A'       | 0.003    | 162.0  | A''      | 0.000      | 171.7  | A'       |               |          |
| <b>S9</b>  | 0.156    | 146.6  | A'       | 0.080    | 162.8  | A'       | 0.000      | 172.1  | A''      |               |          |
| <b>S10</b> | 0.000    | 149.6  | A''      | 0.004    | 165.4  | A''      | 0.157      | 175.6  | A'       |               |          |
| <b>S11</b> | 0.011    | 151.6  | A'       | 0.000    | 169.5  | A''      | 0.008      | 182.3  | A'       |               |          |

Table S4: Oscillator strength and energies (kcal/mol) of 3HAP-a2 singlet excited states

|            | TD-B3LYP |        |          | EOM-CCSD |        |          | CAS(13,16) |        |          | CASPT2(13,16) |          |
|------------|----------|--------|----------|----------|--------|----------|------------|--------|----------|---------------|----------|
|            | f        | energy | symmetry | f        | energy | symmetry | f          | energy | symmetry | energy        | symmetry |
| <b>S1</b>  | 0.000    | 85.9   | A''      | 0.000    | 94.1   | A''      | 0.000      | 97.7   | A''      | 85.3          | A''      |
| <b>S2</b>  | 0.045    | 96.6   | A'       | 0.039    | 106.9  | A'       | 0.070      | 123.0  | A'       | 100.0         | A'       |
| <b>S3</b>  | 0.150    | 117.9  | A'       | 0.000    | 135.4  | A''      | 0.004      | 134.0  | A''      | 126.4         | A'       |
| <b>S4</b>  | 0.000    | 126.7  | A''      | 0.172    | 135.6  | A'       | 0.003      | 154.7  | A''      | 135.4         | A''      |
| <b>S5</b>  | 0.000    | 131.6  | A''      | 0.004    | 151.5  | A''      | 0.000      | 158.8  | A''      | 147.6         | A'       |
| <b>S6</b>  | 0.278    | 135.9  | A'       | 0.550    | 153.6  | A'       | 0.226      | 158.8  | A'       | 152.3         | A''      |
| <b>S7</b>  | 0.003    | 138.2  | A''      | 0.006    | 159.2  | A''      | 0.018      | 172.8  | A''      | 156.2         | A''      |
| <b>S8</b>  | 0.014    | 143.9  | A'       | 0.250    | 161.0  | A'       | 0.005      | 173.2  | A'       |               |          |
| <b>S9</b>  | 0.004    | 146.1  | A''      | 0.001    | 161.9  | A''      | 0.001      | 174.3  | A''      |               |          |
| <b>S10</b> | 0.194    | 146.1  | A'       | 0.113    | 163.3  | A'       | 0.043      | 182.0  | A'       |               |          |
| <b>S11</b> | 0.000    | 148.5  | A''      | 0.001    | 169.4  | A''      | 0.000      | 183.6  | A''      |               |          |
| <b>S12</b> | 0.019    | 149.2  | A'       | 0.011    | 169.8  | A''      | 0.175      | 184.0  | A'       |               |          |
| <b>S13</b> | 0.001    | 151.1  | A''      | 0.020    | 171.7  | A'       | 0.805      | 193.7  | A'       |               |          |

Table S5: Oscillator strength and energies (kcal/mol) of 4HAP-1 singlet excited states

|            | TD-B3LYP |        |          | EOM-CCSD |        |          | CAS(13,16) |        |          | CASPT2(13,16) |          |
|------------|----------|--------|----------|----------|--------|----------|------------|--------|----------|---------------|----------|
|            | f        | energy | symmetry | f        | energy | symmetry | f          | energy | symmetry | energy        | symmetry |
| <b>S1</b>  | 0.000    | 88.5   | A''      | 0.000    | 96.3   | A''      | 0.000      | 99.4   | A''      | 86.2          | A''      |
| <b>S2</b>  | 0.278    | 110.3  | A'       | 0.003    | 113.0  | A'       | 0.033      | 125.2  | A'       | 103.8         | A'       |
| <b>S3</b>  | 0.034    | 111.3  | A'       | 0.380    | 126.2  | A'       | 0.003      | 133.3  | A''      | 117.3         | A'       |
| <b>S4</b>  | 0.000    | 122.1  | A''      | 0.000    | 136.1  | A''      | 0.001      | 149.1  | A''      | 136.2         | A''      |
| <b>S5</b>  | 0.000    | 127.7  | A''      | 0.000    | 151.9  | A''      | 0.231      | 153.9  | A'       | 152.3         | A''      |
| <b>S6</b>  | 0.153    | 131.8  | A'       | 0.288    | 153.5  | A'       | 0.001      | 156.7  | A''      | 157.4         | A'       |
| <b>S7</b>  | 0.000    | 139.8  | A''      | 0.094    | 160.1  | A'       | 0.000      | 164.9  | A''      | 159.3         | A''      |
| <b>S8</b>  | 0.022    | 142.0  | A'       | 0.000    | 160.3  | A''      | 0.020      | 167.7  | A''      |               |          |
| <b>S9</b>  | 0.031    | 145.9  | A'       | 0.000    | 161.3  | A''      | 0.007      | 168.4  | A'       |               |          |
| <b>S10</b> | 0.002    | 147.6  | A''      | 0.001    | 163.6  | A''      | 0.001      | 175.0  | A'       |               |          |
| <b>S11</b> | 0.282    | 149.8  | A'       | 0.396    | 164.6  | A'       | 0.443      | 183.3  | A'       |               |          |
| <b>S12</b> | 0.001    | 151.9  | A''      | 0.004    | 168.1  | A''      | 0.001      | 187.1  | A''      |               |          |

### Excited State Calculations at TD B3LYP/6-311+G\*\* level

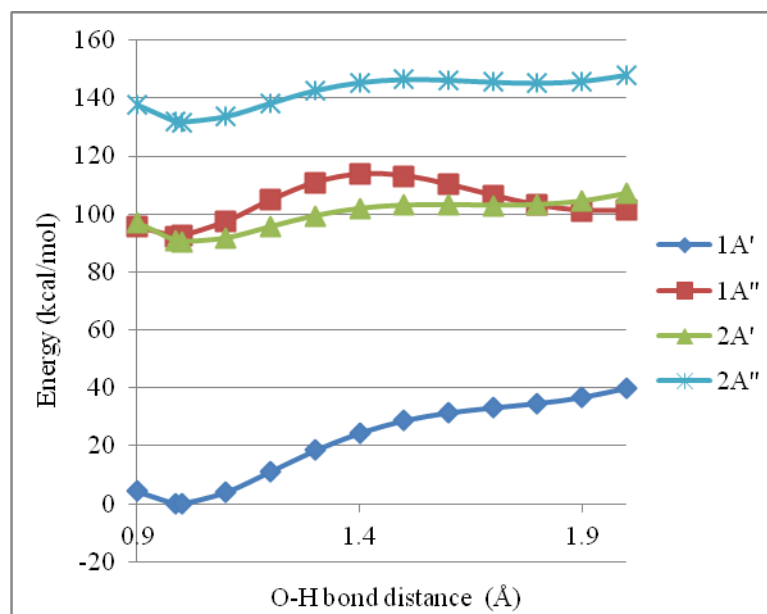

Fig. S1: The potential energies of the ground state and singlet excited states along the O-H bond distance of 2HAP-1 at TD B3LYP/6-311+G\*\* level.

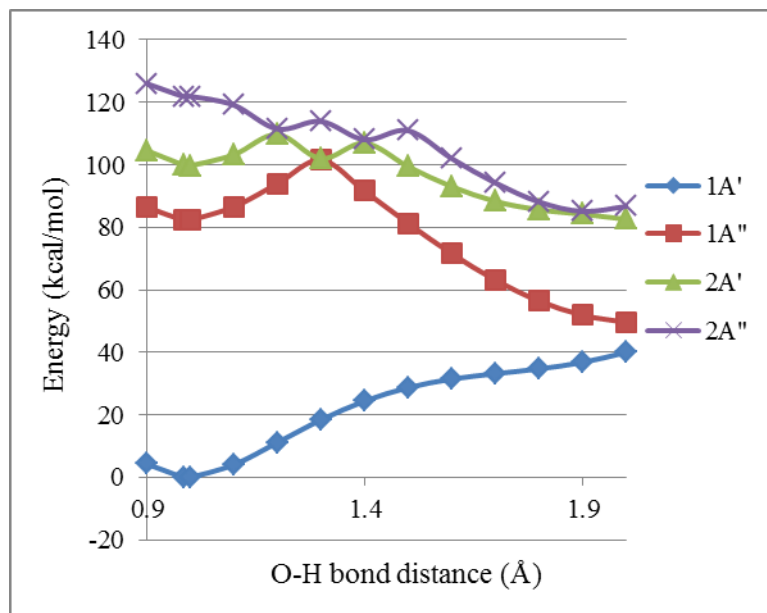

Fig. S2: The potential energies of the ground state and singlet excited states along the O-H bond distance of 2HAP-2 at TD B3LYP/6-311+G\*\* level (non-planar).

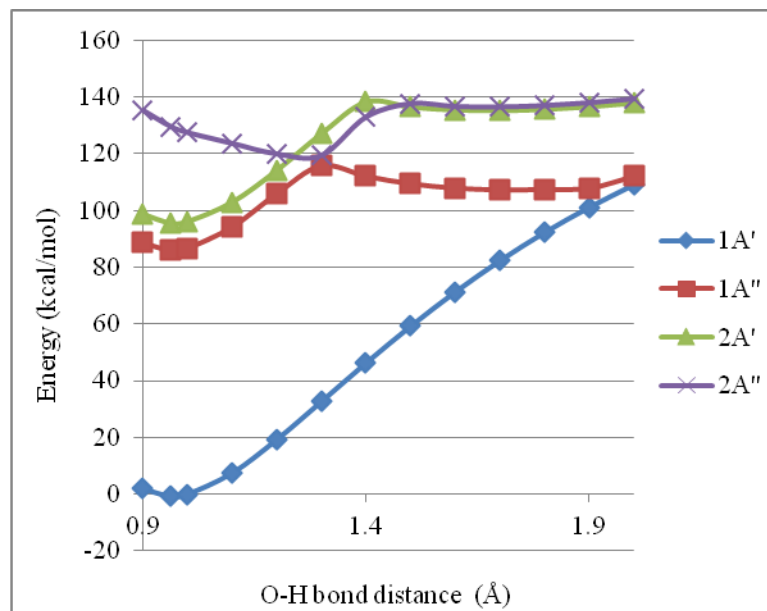

Fig. S3: The potential energies of the ground state and singlet excited states along the O-H bond distance of 3HAP-a1 at TD B3LYP/6-311+G\*\* level.



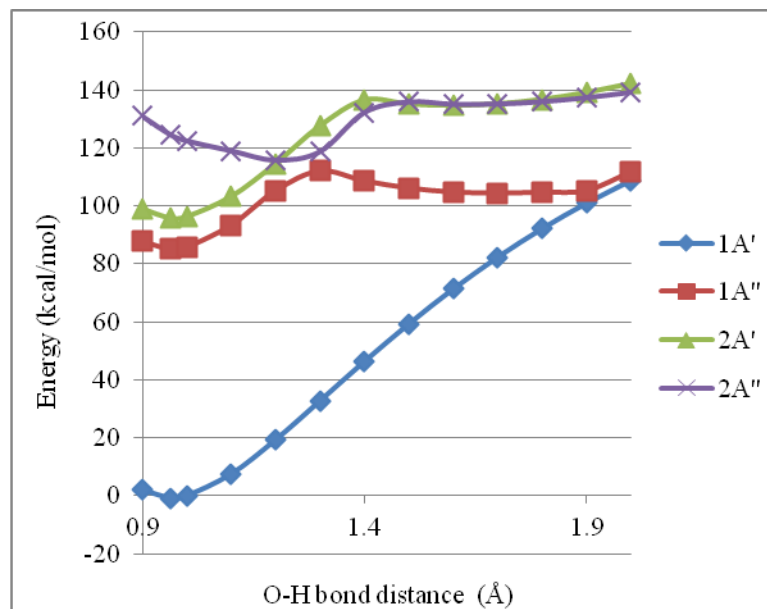

Fig. S4: The potential energies of the ground state and singlet excited states along the O-H bond distance of 3HAP-b1 at TD B3LYP/6-311+G\*\* level.

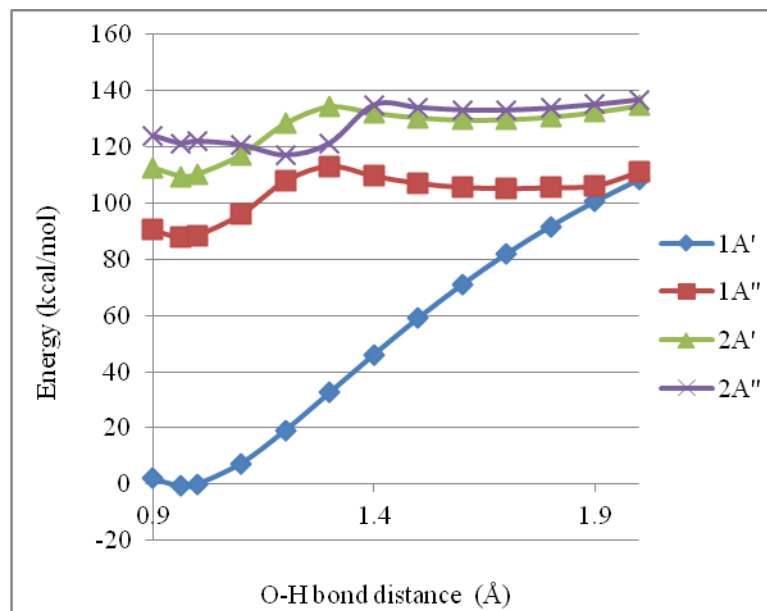

Fig. S5: The potential energies of the ground state and singlet excited states along the O-H bond distance of 4HAP-1 at TD B3LYP/6-311+G\*\* level.

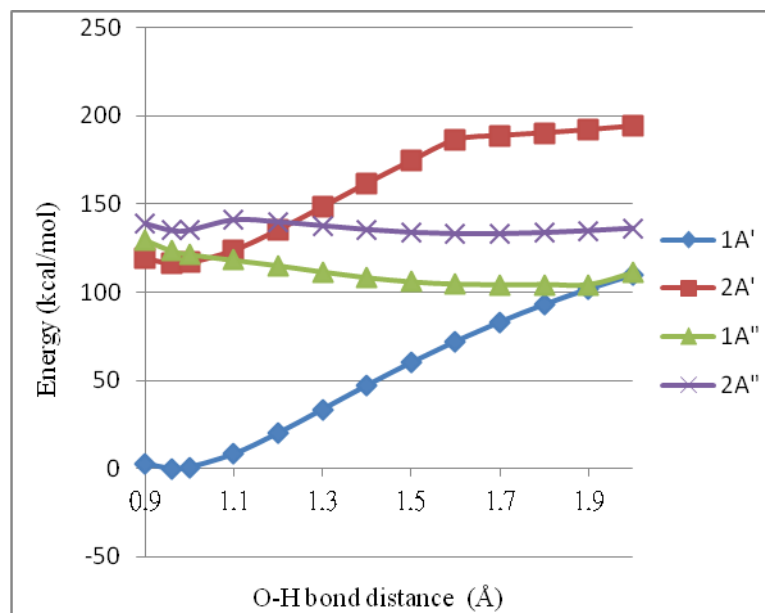

Fig. S6: The potential energies of the ground state and singlet excited states along the O-H bond distance of phenol at TD B3LYP/6-311+G\*\* level.
